# Supplementary material for: Prioritization of Candidate Genes in QTL Regions for Physiological and Biochemical Traits Underlying Drought Response in Barley (Hordeum vulgare L.)
Source: Front Plant Sci. 2018 Jun 12;9:769. doi: 10.3389/fpls.2018.00769 (PMC6005862; doi:10.3389/fpls.2018.00769)
Supplement: Supplementary file 8 [file Data_Sheet_8.XLSX]

## Sheet: Supplementary Material S8
	Supplementary Material S8
	Gene Ontology categories (Biological Processes) significantly over-represented in a subset of genes identified within QTL confidence intervals related to osmoprotectant and hormone content under drought stress (D), for stress indices (DSI), and common for drought stress (D)/stress indices (DSI).
	Lists and characteristics of positional candidate genes belonging to the enriched Gene Ontology categories.

## Sheet: OHC_D_GO
Results of GO enrichment analysis in a subset of genes identified within QTL confidence intervals related to osmoprotectant and hormone content under drought stress (D)
GO-term	p-value	Subset ratio	Biological Process
GO:0090414	0.000895	16.6667	molybdate ion export from vacuole
GO:0034486	0.000895	16.6667	vacuolar transmembrane transport
GO:0032324	0.0045	16.6667	molybdopterin cofactor biosynthetic process
GO:0043545	0.0045	16.6667	molybdopterin cofactor metabolic process
GO:0019720	0.0045	16.6667	Mo-molybdopterin cofactor metabolic process
GO:0006777	0.0045	16.6667	Mo-molybdopterin cofactor biosynthetic process
GO:0051189	0.0045	16.6667	prosthetic group metabolic process
GO:0008272	0.01	16.6667	sulfate transport

## Sheet: OHC_D_genes
Results of GO enrichment analysis in a subset of genes identified within QTL confidence intervals related to osmoprotectant and hormone content under drought stress (D)
Plaza ID	Gene name	Description Plaza	GO-term	Biological Process	Hotspot		QTLs	Ortholog in Arabidopsis
HV160567G00020	MLOC_22343	Molybdate transporter 2	GO:0034486	vacuolar transmembrane transport	qHS2.3	QdPro.2H.2	QdABS/RC.2H.2	AT1G80310
			GO:0090414	molybdate ion export from vacuole
			GO:0008272	sulfate transport
HV50474G00020	MLOC_65646	Molybdopterin biosynthesis protein CNX1	GO:0019720	Mo-molybdopterin cofactor metabolic process	qHS2.3	QdPro.2H.2	QdABS/RC.2H.2	AT5G20990
			GO:0006777	Mo-molybdopterin cofactor biosynthetic process
			GO:0032324	molybdopterin cofactor biosynthetic process
			GO:0043545	molybdopterin cofactor metabolic process
			GO:0051189	prosthetic group metabolic process

## Sheet: OHC_DSI_GO
Results of GO enrichment analysis in a subset of genes identified within QTL confidence intervals related to osmoprotectant and hormone content for stress indices (DSI)
GO-term	p-value	Subset ratio	Biological Process
GO:0009734	4.94e-06	7.8125	auxin mediated signaling pathway
GO:1900457	0.01	1.5625	regulation of brassinosteroid mediated signaling pathway
GO:1900459	0.01	1.5625	positive regulation of brassinosteroid mediated signaling pathway
GO:1901038	0.01	1.5625	cyanidin 3-O-glucoside metabolic process
GO:0042407	0.01	1.5625	cristae formation
GO:1901804	0.01	1.5625	beta-glucoside metabolic process
GO:0043067	0.01	3.125	regulation of programmed cell death
GO:0046686	0.01	6.25	response to cadmium ion
GO:0006423	0.02	1.5625	cysteinyl-tRNA aminoacylation
GO:0019605	0.03	1.5625	butyrate metabolic process
GO:0034051	0.04	1.5625	negative regulation of plant-type hypersensitive response

## Sheet: OHC_DSI_genes
Results of GO enrichment analysis in a subset of genes identified within QTL confidence intervals related to osmoprotectant and hormone content for stress indices (DSI)
Plaza ID	Gene name	Description Plaza	GO-term	Biological Process	Hotspot	QTLs				Ortholog in Arabidopsis
HV42730G00010	MLOC_58506	Auxin-induced protein	GO:0009734	auxin mediated pathway	-	QdsiMal.5H_3				AT1G29420
HV42730G00020	MLOC_58508	Auxin-induced protein	GO:0009734	auxin mediated pathway	-	QdsiMal.5H_3				AT1G29420
HV42730G00030	MLOC_58507	SAUR-like auxin-responsive protein family LENGTH=135	GO:0009734	auxin mediated pathway	-	QdsiMal.5H_3				AT1G29510
HV50090G00010	MLOC_65368	SAUR-like auxin-responsive protein family LENGTH=141	GO:0009734	auxin mediated pathway	-	QdsiMal.5H_3				AT1G29510
HV50964G00010	MLOC_65978	SAUR-like auxin-responsive protein family LENGTH=135	GO:0009734	auxin mediated pathway	-	QdsiMal.5H_3				AT1G29510
HV2547592G00010	MLOC_36976	UDP-Glycosyltransferase superfamily protein LENGTH=453	GO:1901038	cyanidin 3-O-glucoside metabolic process	qHS2.1	QdsiGlu.2H	QdWC.2H	QdWL.2H	QcCAT.2H	AT1G64910
			GO:1901804	beta-glucoside metabolic process
HV56215G00010	MLOC_69302	ascorbate peroxidase 1, cytosolic	GO:0046686	response to cadmium ion	qHS2.1	QdsiGlu.2H	QdWC.2H	QdWL.2H	QcCAT.2H	AT1G07890
HV44492G00010	MLOC_60529	Ubiquitin activating enzyme 2	GO:0046686	response to cadmium ion	qHS2.1	QdsiGlu.2H	QdWC.2H	QdWL.2H	QcCAT.2H	AT2G30110
HV52613G00010	MLOC_67137	Elongation factor 1-alpha	GO:0046686	response to cadmium ion	qHS2.1	QdsiGlu.2H	QdWC.2H	QdWL.2H	QcCAT.2H	AT1G07930
HV66388G00010	MLOC_74704	Cysteine--tRNA ligase	GO:0046686	response to cadmium ion	-	QdsiMal.5H_3				AT2G31170
			GO:0042407	cristae formation
			GO:0043067	regulation of programmed cell death
			GO:0006423	cysteinyl-tRNA aminoacylation
HV157852G00010	MLOC_17904	LITAF-domain-containing protein	GO:0043067	regulation of programmed cell death	qHS2.1	QdsiGlu.2H	QdWC.2H	QdWL.2H	QcCAT.2H	AT5G13190
			GO:0034051	negative regulation of plant-type hypersensitive response
HV61987G00010	MLOC_72613	inactive L-type lectin-domain containing receptor kinase III	GO:1900457	regulation of brassinosteroid mediated pathway	qHS2.1	QdsiGlu.2H	QdWC.2H	QdWL.2H	QcCAT.2H	AT5G18610
HV245323G00010	MLOC_35028	Acetate/butyrate--CoA ligase AAE7, peroxisomal	GO:0019605	butyrate metabolic process	-	QdsiMal.5H_3				AT1G65880

## Sheet: OHC_D_DSI_GO
Results of GO enrichment analysis in a subset of genes identified within QTL confidence intervals related to osmoprotectant and hormone content common to drought stress (D) and stress indices (DSI)
GO-term	p-value	Subset ratio	Biological Process
GO:0042939	0.02	0.641026	tripeptide transport
GO:0072337	0.02	0.641026	modified amino acid transport
GO:0034635	0.02	0.641026	glutathione transport
GO:0007219	0.02	0.641026	Notch signaling pathway
GO:0006114	0.02	0.641026	glycerol biosynthetic process
GO:0009786	0.02	0.641026	regulation of asymmetric cell division
GO:0051202	0.05	0.641026	phytochromobilin metabolic process
GO:0044205	0.05	0.641026	'de novo' UMP biosynthetic process
GO:0010258	0.05	0.641026	NADH dehydrogenase complex (plastoquinone) assembly
GO:0010257	0.05	0.641026	NADH dehydrogenase complex assembly
GO:0010024	0.05	0.641026	phytochromobilin biosynthetic process
GO:0043446	0.05	0.641026	cellular alkane metabolic process
GO:0043447	0.05	0.641026	alkane biosynthetic process

## Sheet: OHC_D_DSI_genes
Results of GO enrichment analysis in a subset of genes identified within QTL confidence intervals related to osmoprotectant and hormone content common to drought stress (D) and stress indices (DSI)
Plaza ID	Gene name	Description Plaza	GO-term	Biological Process	Hotspot	QTLs						Ortholog in Arabidopsis
HV10113G00010	MLOC_174	CRT (chloroquine-resistance transporter)-like transporter 3	GO:0042939	tripeptide transport	qHS3.1	QdsiSach.3H_2.1	QdPro.3H_2.1	QdMal.3H_2.1	QcDlo/CS.3H_2.1	QcTRo/CS.3H_2.1	QcABS/CS.3H_2.1	AT5G12170
			GO:0072337	modified amino acid transport
			GO:0034635	glutathione transport
HV2557894G00010	MLOC_40292	(DL)-glycerol-3-phosphatase	GO:0006114	glycerol biosynthetic process	qHS3.1	QdsiSach.3H_2.1	QdPro.3H_2.1	QdMal.3H_2.1	QcDlo/CS.3H_2.1	QcTRo/CS.3H_2.1	QcABS/CS.3H_2.1	AT4G25840
HV158936G00010	MLOC_20354	Probable gamma-secretase subunit PEN-2	GO:0007219	Notch signaling pathway	qHS3.1	QdsiSach.3H_2.1	QdPro.3H_2.1	QdMal.3H_2.1	QcDlo/CS.3H_2.1	QcTRo/CS.3H_2.1	QcABS/CS.3H_2.1	AT5G09310
HV98873G00010	MLOC_81908	LOB domain-containing protein	GO:0009786	regulation of asymmetric cell division	qHS3.1	QdsiSach.3H_2.1	QdPro.3H_2.1	QdMal.3H_2.1	QcDlo/CS.3H_2.1	QcTRo/CS.3H_2.1	QcABS/CS.3H_2.1	AT3G13850
HV58026G00010	MLOC_70465	Phytochromobilin:ferredoxin oxidoreductase, chloroplastic	GO:0010024	phytochromobilin biosynthetic process	qHS3.1	QdsiSach.3H_2.1	QdPro.3H_2.1	QdMal.3H_2.1	QcDlo/CS.3H_2.1	QcTRo/CS.3H_2.1	QcABS/CS.3H_2.1	AT3G09150
			GO:0051202	phytochromobilin metabolic process
HV1566626G00010	MLOC_13836	NAD(P)H-quinone oxidoreductase subunit	GO:0010258	NADH dehydrogenase complex (plastoquinone) assembly	qHS3.1	QdsiSach.3H_2.2	QdPro.3H_2.3	QdMal.3H_2.2	QcDlo/CS.3H_2.2	QcTRo/CS.3H_2.1	QcABS/CS.3H_2.1	AT1G74880
HV43692G00030	MLOC_59533	Cytochrome b5	GO:0043447	alkane biosynthetic process	qHS3.2	QdsiSach.3H_2.2	QdPro.3H_2.2	QdsiGTte.3H_2	QcDlo/CS.3H_2.2	QcTRo/CS.3H_2.2	QcABS/CS.3H_2.2	AT2G32720
HV138106G00010	MLOC_6793	Phosphoribosyltransferase; Orotidine 5-phosphate decarboxylase	GO:0044205	de novo' UMP biosynthetic process	qHS3.2	QdsiSach.3H_2.2	QdPro.3H_2.2	QdsiGTte.3H_2	QcDlo/CS.3H_2.2	QcTRo/CS.3H_2.2	QcABS/CS.3H_2.2	AT3G54470
